# Supplementary material
Source: PubMed Central journal article supplement (PMC9514166)
Supplement: 41577_2022_784_MOESM1_ESM.pdf [file 41577_2022_784_MOESM1_ESM.pdf]

**Supplementary information**

---

**Broadly neutralizing antibodies to SARS-CoV-2 and other human coronaviruses**

---

In the format provided by the authors and unedited

**Supplementary Table S1.** Detailed characteristics of some representative NTD-targeting neutralizing antibodies

| nAb              | Source                | Binding epitope | Interacting residues in S of SARS-CoV-2              | Mechanism of neutralization                                                                 | Neutralizing breadth                                    | Potency (IC <sub>50</sub> )                                                                             | Refs  |
|------------------|-----------------------|-----------------|------------------------------------------------------|---------------------------------------------------------------------------------------------|---------------------------------------------------------|---------------------------------------------------------------------------------------------------------|-------|
| <b>4A8</b>       | COVID-19 convalescent | Supersite       | 145-147, 149, 150, 152, 246, 258                     | Restrains the conformational changes of Spike                                               | SARS-CoV-2                                              | LV: SARS-CoV-2 0.61 µg/ml                                                                               | 27    |
| <b>COV2-2676</b> | COVID-19 convalescent | Supersite       | Around N3(141-156) and N5(246-260) loops of NTD      | Unknown                                                                                     | SARS-CoV-2                                              | LV: SARS-CoV-2 0.5 µg/ml                                                                                | 28    |
| <b>COV2-2489</b> | COVID-19 convalescent | Supersite       | Around N3(141-156) and N5(246-260) loops of NTD      | Unknown                                                                                     | SARS-CoV-2                                              | LV: SARS-CoV-2 0.2 µg/ml                                                                                | 28    |
| <b>4-8</b>       | COVID-19 convalescent | Supersite       | 144-148, 152, 154-158, 160-162, 246-254              | Unknown                                                                                     | SARS-CoV-2 WT and Alpha variant                         | LV: SARS-CoV-2 0.009 µg/ml<br>PV: Alpha ~0.005 µg/ml                                                    | 29,34 |
| <b>5-24</b>      | COVID-19 convalescent | Supersite       | 144-148, 150, 152, 154-158, 161, 162, 246-254, 256   | Unknown                                                                                     | SARS-CoV-2                                              | LV: SARS-CoV-2 0.008 µg/ml                                                                              | 29,34 |
| <b>5-7</b>       | COVID-19 convalescent | Non-Supersite   | 104, 119, 126, 172, 175-177, 190, 192, 207, 224, 227 | Restrains the conformational changes of Spike                                               | SARS-CoV-2 WT and variants (Alpha, Beta, BA.1 and BA.3) | LV: SARS-CoV-2 0.033 µg/ml<br>PV: Alpha ~0.25 µg/ml<br>PV: Beta ~2.8 µg/ml<br>PV: BA.1, BA.3 ~0.1 µg/ml | 29,34 |
| <b>S2M28</b>     | COVID-19 convalescent | Supersite       | Around 14-20, 140-158, 245-264                       | Prevents interaction with an auxiliary receptor, proteolytic activation, or membrane fusion | SARS-CoV-2                                              | LV: SARS-CoV-2 0.011 µg/ml                                                                              | 33    |
| <b>S2X28</b>     | COVID-19 convalescent | Supersite       | Around 14-20, 140-158, 245-264                       | Prevents interaction with an auxiliary receptor, proteolytic activation, or membrane fusion | SARS-CoV-2                                              | LV: SARS-CoV-2 0.006 µg/ml                                                                              | 33    |
| <b>S2X333</b>    | COVID-19 convalescent | Supersite       | Around 14-20, 140-158, 245-264                       | Prevents interaction with an auxiliary receptor, proteolytic activation, or membrane fusion | SARS-CoV-2                                              | LV: SARS-CoV-2 0.002 µg/ml                                                                              | 33    |

|                  |                                            |               |                                    |                                                                |                                                                 |                                                                                                                                                 |       |
|------------------|--------------------------------------------|---------------|------------------------------------|----------------------------------------------------------------|-----------------------------------------------------------------|-------------------------------------------------------------------------------------------------------------------------------------------------|-------|
| <b>C1717</b>     | COVID-19 convalescent                      | Non-Supersite | 210-218, 278, 282, 286-303         | Prevents access to the S2' cleavage site or destabilizes of S1 | SARS-CoV-2 WT and variants (Alpha, Beta, Gamma and BA.1)        | LV: SARS-CoV-2 0.287µg/ml<br>PV: Alpha 0.149µg/ml<br>LV: Beta 0.118µg/ml<br>PV: Gamma 0.232µg/ml<br>PV:BA.1 0.507µg/ml                          | 40    |
| <b>C1520</b>     | COVID-19 convalescent                      | Non-Supersite | 97-102, 122, 149, 152-158, 178-188 | Unknown                                                        | SARS-CoV-2 WT and variants (Alpha, Beta, Gamma, Delta and BA.1) | LV: SARS-CoV-2 0.004µg/ml<br>PV: Alpha 0.06µg/ml<br>LV: Beta 0.002µg/ml<br>PV: Gamma 0.536µg/ml<br>PV: Delta 0.049µg/ml<br>PV:BA.1 0.031µg/ml   | 40    |
| <b>C1791</b>     | COVID-19 convalescent                      | Non-Supersite | Unknown                            | Unknown                                                        | SARS-CoV-2 WT and variants (Alpha, Beta, Gamma, Delta and BA.1) | LV: SARS-CoV-2 0.824µg/ml<br>PV: Alpha 0.839µg/ml<br>PV: Beta 0.249µg/ml<br>PV: Gamma 0.099µg/ml<br>PV: Delta 0.388µg/ml<br>PV: BA.1 0.507µg/ml | 40    |
| <b>BLN14</b>     | phage-display library of COVID-19 patients | Supersite     | Around N3(141-156) loop of NTD     | Unknown                                                        | SARS-CoV-2 WT and Alpha variant                                 | LV: SARS-CoV-2 0.07 µg/ml<br>LV: Alpha 0.04 µg/ml                                                                                               | 37,38 |
| <b>BLN12</b>     | phage-display library of COVID-19 patients | Supersite     | Around N3(141-156) loop of NTD     | Unknown                                                        | SARS-CoV-2                                                      | LV: SARS-CoV-2 0.07 µg/ml                                                                                                                       | 37,38 |
| <b>ADI-56479</b> | COVID-19 convalescent                      | Supersite     | 145, 150, 152                      | Inhibits the attachment of ACE2                                | SARS-CoV-2                                                      | LV: SARS-CoV-2 144pM                                                                                                                            | 39    |

PV: pseudovirus; LV: live virus; SARS-CoV-2 WT: the SARS-CoV-2 Wuhan strain or in some cases the D614G variant. If the neutralizing potency was tested against both PV and LV, only IC<sub>50</sub> for neutralizing LV was listed in the table.

**Supplementary Table S2.** Detailed characteristics of some representative RBD-targeting neutralizing antibodies

| nAb              | Source                                   | Binding epitope | Interacting residues in S of SARS-CoV-2                   | Mechanism of neutralization                 | Neutralizing breadth                                                           | Potency (IC <sub>50</sub> )                                                                                                                                              | Refs     |
|------------------|------------------------------------------|-----------------|-----------------------------------------------------------|---------------------------------------------|--------------------------------------------------------------------------------|--------------------------------------------------------------------------------------------------------------------------------------------------------------------------|----------|
| <b>1-20</b>      | COVID-19 convalescent                    | Class 1         | Unknown                                                   | Blocks the interaction between RBD and ACE2 | SARS-CoV-2                                                                     | LV: SARS-CoV-2 0.008 µg/ml                                                                                                                                               | 29       |
| <b>4-20</b>      | COVID-19 convalescent                    | Class 1         | Unknown                                                   | Blocks the interaction between RBD and ACE2 | SARS-CoV-2                                                                     | LV: SARS-CoV-2 0.017 µg/ml                                                                                                                                               | 29       |
| <b>910-30</b>    | COVID-19 convalescent and yeast display  | Class 1         | 415-417, 420, 421, 455, 457, 473, 475, 487, 498, 501, 505 | Blocks the interaction between RBD and ACE2 | SARS-CoV-2                                                                     | LV: SARS-CoV-2 0.004 µg/ml                                                                                                                                               | 44       |
| <b>CB6</b>       | COVID-19 convalescent                    | Class 1         | 420, 421, 455-457, 473, 475, 486, 487, 489, 493           | Blocks the interaction between RBD and ACE2 | SARS-CoV-2 WT and variants (Alpha and Delta)                                   | LV: SARS-CoV-2 0.036 µg/ml<br>PV: Alpha 0.023 µg/ml<br>PV: Delta 0.015 µg/ml                                                                                             | 42,48    |
| <b>CB1</b>       | COVID-19 convalescent                    | Class 1         | Unknown                                                   | Blocks the interaction between RBD and ACE2 | SARS-CoV-2                                                                     | LV: SARS-CoV-2 0.382 µg/ml                                                                                                                                               | 42       |
| <b>CT-P59</b>    | COVID-19 convalescent                    | Class 1         | 449, 450, 453, 456, 484-486, 489, 490, 492-495            | Blocks the interaction between RBD and ACE2 | SARS-CoV-2 WT and variants (Alpha, Beta, Gamma and Delta)                      | LV: SARS-CoV-2 0.008 µg/ml<br>PV: Alpha 0.006 µg/ml<br>PV: Beta 0.066 µg/ml<br>PV: Gamma 0.04 µg/ml<br>PV: Delta 0.015 µg/ml                                             | 43,48    |
| <b>REGN10933</b> | humanized mice and COVID-19 convalescent | Class 1         | Unknown                                                   | Blocks the interaction between RBD and ACE2 | SARS-CoV-2 WT and variants (Alpha, Delta and BA.2.75)                          | PV: SARS-CoV-2 0.006 µg/ml<br>PV: Alpha 0.01 µg/ml<br>PV: Delta 0.003 µg/ml<br>PV: BA.2.75 0.278 µg/ml                                                                   | 48,53,62 |
| <b>A23-58.1</b>  | COVID-19 convalescent                    | Class 1         | 456, 473, 477, 478, 484, 486, 487, 489                    | Blocks the interaction between RBD and ACE2 | SARS-CoV-2 WT and variants (Alpha, Beta, Gamma, Delta, BA.1, BA.2 and BA.2.75) | LV: SARS-CoV-2 0.002 µg/ml<br>PV: Alpha 0.002 µg/ml<br>PV: Beta 0.005 µg/ml<br>PV: Gamma 0.002 µg/ml<br>PV: Delta 0.002 µg/ml<br>PV: BA.1, BA.2, BA.2.75 0.01~0.36 µg/ml | 48,58,81 |

|                  |                       |         |                                                      |                                             |                                                                                                 |                                                                                                                                                                                          |                |
|------------------|-----------------------|---------|------------------------------------------------------|---------------------------------------------|-------------------------------------------------------------------------------------------------|------------------------------------------------------------------------------------------------------------------------------------------------------------------------------------------|----------------|
| <b>S2E12</b>     | COVID-19 convalescent | Class 1 | Around 486                                           | Blocks the interaction between RBD and ACE2 | SARS-CoV-2 WT and variants (Alpha, Beta, Gamma, Delta, BA.1, BA.2 and BA.2.75)                  | LV: SARS-CoV-2, 0.004 µg/ml<br>LV: Alpha, 0.003 µg/ml<br>LV: Beta, 0.002 µg/ml<br>PV: Gamma, 0.002 µg/ml<br>LV: Delta, 0.002 µg/ml<br>PV: BA.1, BA.2, BA.2.75 0.01~0.08 µg/ml            | 47-49,81       |
| <b>S2K146</b>    | COVID-19 convalescent | Class 1 | 417, 449, 455, 485-487, 489, 492-494, 498, 502       | Blocks the interaction between RBD and ACE2 | SARS-CoV; SARS-CoV-2 WT and variants (Alpha, Beta, Delta, BA.1, BA.2, BA.3, BA.4/5 and BA.2.75) | PV: SARS-CoV 0.108 µg/ml<br>LV: SARS-CoV-2 0.01 µg/ml<br>LV: Alpha 0.009 µg/ml<br>LV: Beta 0.009 µg/ml<br>LV: Delta 0.008 µg/ml<br>PV: BA.1, BA.2, BA.3, BA.4/5, BA.2.75 0.01~0.22 µg/ml | 49,50,80,81    |
| <b>CC12.3</b>    | COVID-19 patients     | Class 1 | 415, 417, 420, 421, 453, 455-457, 473, 475, 487, 489 | Blocks the interaction between RBD and ACE2 | SARS-CoV-2 WT and variants (Alpha and Delta)                                                    | PV: SARS-CoV-2 0.012 µg/ml<br>PV: Alpha 0.029 µg/ml<br>PV: Delta 0.012 µg/ml                                                                                                             | 67,72          |
| <b>B38</b>       | COVID-19 convalescent | Class 1 | 415, 417, 420, 421, 455-457, 473, 475, 487, 489      | Blocks the interaction between RBD and ACE2 | SARS-CoV-2 WT and Beta variant                                                                  | LV: Beta 0.177 µg/ml                                                                                                                                                                     | 73             |
| <b>2-15</b>      | COVID-19 convalescent | Class 2 | Around 484, 490                                      | Blocks the interaction between RBD and ACE2 | SARS-CoV-2 WT and Alpha variant                                                                 | LV: SARS-CoV-2 0.001 µg/ml<br>PV: Alpha 0.003 µg/ml                                                                                                                                      | 29,32          |
| <b>LY-CoV555</b> | COVID-19 convalescent | Class 2 | 484, 486, 490, 493, 494                              | Blocks the interaction between RBD and ACE2 | SARS-CoV-2 WT and Alpha variant                                                                 | LV: SARS-CoV-2 ~0.02µg/ml<br>PV: Alpha 0.008µg/ml                                                                                                                                        | 48,51          |
| <b>COV2-2196</b> | COVID-19 convalescent | Class 2 | Around 486, 487                                      | Blocks the interaction between RBD and ACE2 | SARS-CoV-2 WT and variants (Alpha, Beta, Gamma, Delta, BA.1, BA.2, BA.3 and BA.2.75)            | LV: SARS-CoV-2 0.015 µg/ml<br>PV: Alpha 0.003 µg/ml<br>PV: Beta 0.004 µg/ml<br>PV: Gamma 0.002 µg/ml<br>PV: Delta 0.001 µg/ml<br>PV: BA.1, BA.2, BA.3, BA.2.75 0.12~5.6 µg/ml            | 48,54,61,62,80 |

|                   |                       |         |                                      |                                                                         |                                                                                                       |                                                                                                                                                                                                               |                |
|-------------------|-----------------------|---------|--------------------------------------|-------------------------------------------------------------------------|-------------------------------------------------------------------------------------------------------|---------------------------------------------------------------------------------------------------------------------------------------------------------------------------------------------------------------|----------------|
| <b>C121</b>       | COVID-19 convalescent | Class 2 | Unknown                              | Blocks the interaction between RBD and ACE2                             | SARS-CoV-2 WT and Alpha variant                                                                       | LV: SARS-CoV-2 0.002 µg/ml<br>PV: Alpha ~0.001 µg/ml                                                                                                                                                          | 32,74          |
| <b>C144</b>       | COVID-19 convalescent | Class 2 | Unknown                              | Blocks the interaction between RBD and ACE2                             | SARS-CoV-2 WT and Alpha variant                                                                       | LV: SARS-CoV-2 0.003 µg/ml<br>PV: Alpha ~0.006 µg/ml                                                                                                                                                          | 48,74          |
| <b>A19-46.1</b>   | COVID-19 convalescent | Class 2 | Around 449, 450, 452                 | Blocks the interaction between RBD and ACE2                             | SARS-CoV-2 WT and variants (Alpha, Beta, and Gamma)                                                   | LV: SARS-CoV-2 0.005 µg/ml<br>PV: Alpha 0.039 µg/ml<br>PV: Beta 0.057 µg/ml<br>PV: Gamma 0.04 µg/ml                                                                                                           | 48,58          |
| <b>P2B-2F6</b>    | COVID-19 convalescent | Class 2 | 444, 446-450, 452, 483-485, 490, 494 | Blocks the interaction between RBD and ACE2                             | SARS-CoV-2                                                                                            | LV: SARS-CoV-2 0.41 µg/ml                                                                                                                                                                                     | 77             |
| <b>S309</b>       | SARS-CoV convalescent | Class 3 | 334, 337, 346, 356                   | Leads to S trimer cross-linking, steric hindrance or aggregates virions | SARS-CoV; SARS-CoV-2 WT and variants (Alpha, Beta, Gamma, Delta, BA.1, BA.2, BA.3 BA.4/5 and BA.2.75) | LV: SARS-CoV 0.12 µg/ml<br>LV: SARS-CoV-2 0.079 µg/ml<br>PV: Alpha 0.031 µg/ml<br>PV: Beta 0.028 µg/ml<br>PV: Gamma 0.042 µg/ml<br>PV: Delta 0.045 µg/ml<br>PV: BA.1, BA.2, BA.3, BA.4/5, BA.2.75 0.1~1 µg/ml | 36,48,56,61,62 |
| <b>LY-CoV1404</b> | COVID-19 convalescent | Class 3 | 345, 346, 439-441, 443-450, 498-502  | Blocks the interaction between RBD and ACE2                             | SARS-CoV-2 WT and variants (Alpha, Beta, Gamma, Delta, BA.1, BA.2, BA.3, BA.4/5 and BA.2.75)          | LV: SARS-CoV-2 0.011 µg/ml<br>LV: Alpha 0.004 µg/ml<br>LV: Beta 0.007 µg/ml<br>PV: Gamma 0.012 µg/ml<br>LV: Delta 0.008 µg/ml<br>PV: BA.1, BA.2, BA.3, BA.4/5, BA.2.75 ~0.002 µg/ml                           | 36,48,57,61,62 |
| <b>COV2-2130</b>  | COVID-19 convalescent | Class 3 | Around 444, 447                      | Blocks the interaction between RBD and ACE2                             | SARS-CoV-2 WT and variants (Alpha, Beta, Gamma, Delta, BA.1, BA.2, BA.3, BA.4/5 and BA.2.75)          | LV: SARS-CoV-2 0.107 µg/ml<br>PV: Alpha 0.014 µg/ml<br>PV: Beta 0.005 µg/ml<br>PV: Gamma 0.014 µg/ml<br>PV: Delta 0.025 µg/ml<br>PV: BA.1, BA.2, BA.3, BA.4/5, BA.2.75 0.01~5.85 µg/ml                        | 48,54,61,62,80 |

|                  |                                                                          |         |                                                           |                                                            |                                                                                     |                                                                                                                                                                                |                |
|------------------|--------------------------------------------------------------------------|---------|-----------------------------------------------------------|------------------------------------------------------------|-------------------------------------------------------------------------------------|--------------------------------------------------------------------------------------------------------------------------------------------------------------------------------|----------------|
| <b>REGN10987</b> | humanized mice and COVID-19 convalescent                                 | Class 3 | Unknown                                                   | Blocks the interaction between RBD and ACE2                | SARS-CoV-2 WT and variants (Alpha, Beta, Gamma, Delta, BA.1, BA.2 and BA.4/5)       | PV: SARS-CoV-2 0.02 µg/ml<br>PV: Alpha 0.014 µg/ml<br>PV: Beta 0.024 µg/ml<br>PV: Gamma 0.007 µg/ml<br>PV: Delta 0.455 µg/ml<br>PV: BA.1, BA.2, BA.4/5, 1~10 µg/ml             | 48,53,61,62    |
| <b>SP1-77</b>    | V <sub>H</sub> 1-2/V <sub>κ</sub> 1-33-rearranging humanized mouse model | Class 3 | 343, 345, 346, 440-442, 444, 445                          | Prevents the shedding of S1 and blocks the membrane fusion | SARS-CoV-2 WT and variants (Alpha, Beta, Gamma, Delta, BA.1, BA.2, BA.3 and BA.4/5) | LV: SARS-CoV-2 0.001 µg/ml<br>LV: Alpha 0.001 µg/ml<br>LV: Beta 0.001 µg/ml<br>LV: Gamma 0.001 µg/ml<br>LV: Delta 0.01 µg/ml<br>PV: BA.1, BA.2, BA.3, BA.4/5 0.007~0.033 µg/ml | 63             |
| <b>A19-61.1</b>  | COVID-19 convalescent                                                    | Class 3 | Around 444, 446, 494                                      | Causes the steric hindrance between RBD and ACE2           | SARS-CoV-2 WT and variants (Alpha, Beta, Gamma and Delta)                           | LV: SARS-CoV-2 0.002 µg/ml<br>PV: Alpha 0.031 µg/ml<br>PV: Beta 0.011 µg/ml<br>PV: Gamma 0.007 µg/ml<br>PV: Delta 0.019 µg/ml                                                  | 48,58          |
| <b>2-7</b>       | COVID-19 convalescent                                                    | Class 3 | 440, 444, 445, 447, 450, 499-501                          | Blocks the interaction between RBD and ACE2                | SARS-CoV-2 WT and variants (Alpha, Beta, Gamma, BA.1, BA.2 and BA.4/5)              | LV: SARS-CoV-2 0.003 µg/ml<br>PV: Alpha ~0.01 µg/ml<br>PV: Beta ~0.01 µg/ml<br>PV: Gamma ~0.01 µg/ml<br>PV: BA.1, BA.2, BA.4/5 0.1~1 µg/ml                                     | 29,32,46,55,61 |
| <b>1-57</b>      | COVID-19 convalescent                                                    | Class 3 | 351, 444, 446, 447, 450, 452, 470, 484, 490, 492-494, 498 | Blocks the interaction between RBD and ACE2                | SARS-CoV-2 WT and variants (Alpha, Beta, and Gamma)                                 | LV: SARS-CoV-2 0.009 µg/ml<br>PV: Alpha ~0.01 µg/ml<br>PV: Beta ~0.01 µg/ml<br>PV: Gamma ~0.01 µg/ml                                                                           | 29,32,46,55    |
| <b>002-S21F2</b> | COVID-19 convalescent                                                    | Class 3 | 345, 346, 440, 448                                        | Blocks the interaction between RBD and ACE2                | SARS-CoV-2 WT and variants (Alpha, Beta, Gamma, Delta, BA.1 and BA.2)               | LV: SARS-CoV-2 0.05 µg/ml<br>LV: Alpha 0.02 µg/ml<br>LV: Beta 0.02 µg/ml<br>LV: Gamma 0.03 µg/ml<br>LV: Delta 0.03 µg/ml<br>LV: BA.1, BA.2 ~0.05 µg/ml                         | 76             |

|               |                                                    |         |                                                                                      |                                                  |                                                                               |                                                                                                                                                                                   |          |
|---------------|----------------------------------------------------|---------|--------------------------------------------------------------------------------------|--------------------------------------------------|-------------------------------------------------------------------------------|-----------------------------------------------------------------------------------------------------------------------------------------------------------------------------------|----------|
| <b>P2G3</b>   | COVID-19 patient                                   | Class 3 | 346, 440, 442, 444-446, 448, 451                                                     | Blocks the interaction between RBD and ACE2      | SARS-CoV-2 WT and variants (Alpha, Beta, Gamma, Delta, BA.1, BA.2 and BA.4/5) | LV: SARS-CoV-2 ~0.02 µg/ml<br>LV: Alpha ~0.005 µg/ml<br>LV: Beta ~0.01 µg/ml<br>LV: Gamma ~0.01 µg/ml<br>LV: Delta 0.011 µg/ml<br>LV: BA.1, BA.2, BA.4/5 ~0.02 µg/ml              | 59,60    |
| <b>n3113v</b> | phage-display naïve single-domain antibody library | Class 3 | 340, 341, 344-349, 351, 352, 443, 444, 448-450, 452, 466, 468-472, 482, 490, 492-494 | Inhibits SARS-CoV-2 S mediated membrane fusion   | SARS-CoV-2 WT and variants (Alpha, Beta, Gamma, Delta and BA.1)               | PV: SARS-CoV-2 0.06 µg/ml                                                                                                                                                         | 78,79    |
| <b>CR3022</b> | SARS-CoV convalescent                              | Class 4 | 369, 372, 374, 377, 378, 380, 382, 390, 392, 430, 515, 517                           | Unknown                                          | SARS-CoV                                                                      | LV: SARS-CoV ~50 µg/ml                                                                                                                                                            | 64       |
| <b>2-36</b>   | COVID-19 convalescent                              | Class 4 | 369, 377-380, 408, 414, 427                                                          | Causes the steric hindrance between RBD and ACE2 | SARS-CoV; SARS-CoV-2 WT and variants (Alpha, Beta, Gamma, Delta and BA.1)     | LV: SARS-CoV ~7.5 µg/ml<br>LV: SARS-CoV-2 ~0.1 µg/ml<br>LV: Alpha ~0.03 µg/ml<br>LV: Beta ~0.2 µg/ml<br>LV: Gamma ~0.06 µg/ml<br>PV: BA.1 ~1 µg/ml                                | 29,36,65 |
| <b>S2X259</b> | COVID-19 convalescent                              | Class 4 | 369, 377-380, 383, 385, 405, 408                                                     | Blocks the interaction between RBD and ACE2      | SARS-CoV; SARS-CoV-2 WT and variants (Alpha, Beta, Gamma, Delta and BA.1)     | PV: SARS-CoV ~0.1 µg/ml<br>LV: SARS-CoV-2 0.144 µg/ml<br>PV: Alpha ~0.1 µg/ml<br>PV: Beta ~0.2 µg/ml<br>PV: Gamma ~0.3 µg/ml<br>PV: BA.1 ~0.6 µg/ml                               | 50,66    |
| <b>ADG20</b>  | SARS-CoV convalescent and yeast display            | Class 4 | 403, 405, 408, 498, 500-503, 505, 506                                                | Competes with ACE2 for RBD binding               | SARS-CoV; SARS-CoV-2 WT and variants (Alpha, Beta, Gamma, Delta and BA.1)     | PV: SARS-CoV 0.002 µg/ml<br>PV: SARS-CoV-2 0.012 µg/ml<br>PV: Alpha 0.009 µg/ml<br>PV: Beta 0.015 µg/ml<br>PV: Gamma 0.013 µg/ml<br>PV: Delta 0.014 µg/ml<br>PV: BA.1 1.203 µg/ml | 67,68    |
| <b>DH1047</b> | COVID-19 convalescent and SARS-CoV convalescent    | Class 4 | Unknown                                                                              | Unknown                                          | SARS-CoV; SARS-CoV-2 WT and variants (Alpha,                                  | LV: SARS-CoV 0.028 µg/ml<br>LV: SARS-CoV-2 0.397 µg/ml<br>LV: Alpha 0.081 µg/ml<br>LV: Beta 0.111 µg/ml                                                                           | 61,69    |



|                 |                                                      |         |                                                              |                                                  |                                                                  |                                                                    |    |
|-----------------|------------------------------------------------------|---------|--------------------------------------------------------------|--------------------------------------------------|------------------------------------------------------------------|--------------------------------------------------------------------|----|
|                 |                                                      |         |                                                              |                                                  | Beta, Gamma, Delta and BA.1)                                     | PV: Gamma 0.163 µg/ml<br>PV: Delta 0.16 µg/ml<br>PV: BA.1 ~7 µg/ml |    |
| <b>COVA1-16</b> | COVID-19 convalescent                                | Class 4 | 369, 371, 378, 379, 408, 414, 427, 429                       | Causes the steric hindrance between RBD and ACE2 | SARS-CoV; SARS-CoV-2                                             | PV: SARS-CoV 2.5 µg/ml<br>PV: SARS-CoV-2 0.13 µg/ml                | 70 |
| <b>H014</b>     | phage-display library of SARS-CoV RBD immunized mice | Class 4 | 368-386, 405-408, 411-413, 439, 503, 508                     | Prevents attachment of SARS-CoV-2 to ACE2        | SARS-CoV; SARS-CoV-2 WT and Beta variant                         | PV: SARS-CoV 1nM<br>PV: SARS-CoV-2 3nM<br>LV: Beta 38nM            | 71 |
| <b>EY6A</b>     | COVID-19 convalescent                                | Class 4 | 369, 377-386, 392, 412, 427, 429, 482, 517                   | Interferes with ACE2 attachment                  | SARS-CoV-2                                                       | LV: SARS-CoV-2 0.39 µg/ml                                          | 75 |
| <b>n3130v</b>   | phage-display naïve single-domain antibody library   | Class 4 | 355, 357, 393, 394, 396, 426-430, 462-465, 514-519, 521, 523 | Induces S trimer to adopt unstable 'up' states   | SARS-CoV-2 WT and variants (Alpha, Beta, Gamma, Delta, and BA.1) | PV: SARS-CoV-2 0.747 µg/ml                                         | 78 |

PV: pseudovirus; LV: live virus; SARS-CoV-2 WT: the SARS-CoV-2 Wuhan strain or in some cases the D614G variant. If the neutralizing potency was tested against both PV and LV, only IC<sub>50</sub> for neutralizing LV was listed in the table.

**Supplementary Table S3.** Detailed characteristics of some representative S2-targeting neutralizing antibodies

| nAb             | Source                                | Binding epitope   | Interacting residues in S of SARS-CoV-2 | Mechanism of neutralization  | Neutralizing breadth                                 | Potency (IC <sub>50</sub> )                                                                                                                                                                                                      | Refs |
|-----------------|---------------------------------------|-------------------|-----------------------------------------|------------------------------|------------------------------------------------------|----------------------------------------------------------------------------------------------------------------------------------------------------------------------------------------------------------------------------------|------|
| <b>S2P6</b>     | COVID-19 convalescent                 | S2-stem helix     | 1148, 1149, 1151, 1152, 1155, 1156      | Inhibits the membrane fusion | BetaCoV (sarbecovirus, merbecovirus and embecovirus) | PV: SARS-CoV 2.4 µg/ml<br>PV: SARS-CoV-2 1.4 µg/ml<br>PV: MERS-CoV 17.1 µg/ml<br>PV: HCoV-OC43 1.3 µg/ml                                                                                                                         | 83   |
| <b>CC40.8</b>   | COVID-19 convalescent                 | S2-stem helix     | 1142-1146, 1148, 1151-1156, 1158, 1159  | Inhibits the membrane fusion | BetaCoV (sarbecovirus, HCoV-HKU1)                    | PV: SARS-CoV 1~10 µg/ml<br>PV: SARS-CoV-2 WT, Alpha, Beta, Gamma, and Delta variants 1~10 µg/ml                                                                                                                                  | 84   |
| <b>WS6</b>      | SARS-CoV-2 Spike mRNA-immunized mouse | S2-stem helix     | 1148, 1149, 1152, 1153, 1155, 1156      | Inhibits the membrane fusion | BetaCoV (sarbecovirus)                               | PV: SARS-CoV 1.93 µg/ml<br>PV: SARS-CoV-2 WT, Alpha, Beta, Gamma, Delta, and BA.1 variants 2.46-26.52 µg/ml                                                                                                                      | 85   |
| <b>COV44-62</b> | COVID-19 convalescent                 | S2-fusion peptide | 814-816, 818-820, 822-824               | Inhibits the membrane fusion | AlphaCoV and BetaCoV                                 | PV: SARS-CoV 6.37 µg/ml<br>PV: SARS-CoV-2 WT, Alpha, Beta, Gamma, Delta, BA.1 and BA.2 variants 9.8-20.26 µg/ml<br>PV: MERS-CoV 25.48 µg/ml<br>PV: HCoV-NL63 1.06 µg/ml<br>PV: HCoV-229E 2.11 µg/ml<br>LV: HCoV-OC43 22.87 µg/ml | 86   |
| <b>COV44-79</b> | COVID-19 convalescent                 | S2-fusion peptide | 815, 816, 818-820, 822, 823             | Inhibits the membrane fusion | AlphaCoV and BetaCoV (except MERS-CoV)               | PV: SARS-CoV 20.91 µg/ml<br>PV: SARS-CoV-2 WT, Alpha, Beta, Gamma, Delta, BA.1 and BA.2 variants 16.51-55.44 µg/ml<br>PV: HCoV-NL63 3.24 µg/ml<br>PV: HCoV-229E 56.19 µg/ml<br>LV: HCoV-OC43 28.4 µg/ml                          | 86   |
| <b>VN01H1</b>   | SARS-CoV-2 vaccinee                   | S2-fusion peptide | 813, 815, 816, 820-824                  | Inhibits the membrane fusion | AlphaCoV and BetaCoV                                 | PV: SARS-CoV ~10 µg/ml<br>PV: SARS-CoV-2 ~20 µg/ml<br>PV: MERS-CoV ~20 µg/ml                                                                                                                                                     | 87   |

|               |                       |                   |                                   |                              |                      |                                                                                                                                                                        |    |
|---------------|-----------------------|-------------------|-----------------------------------|------------------------------|----------------------|------------------------------------------------------------------------------------------------------------------------------------------------------------------------|----|
|               |                       |                   |                                   |                              |                      | PV: HCoV-229E ~2 µg/ml<br>PV: HCoV-NL63 ~2 µg/ml                                                                                                                       |    |
| <b>VP12E7</b> | SARS-CoV-2 vaccinee   | S2-fusion peptide | Unknown                           | Inhibits the membrane fusion | AlphaCoV and BetaCoV | PV: SARS-CoV ~30 µg/ml<br>PV: SARS-CoV-2 ~100 µg/ml<br>PV: MERS-CoV ~90 µg/ml<br>PV: HCoV-229E ~10 µg/ml<br>PV: HCoV-NL63 ~6 µg/ml                                     | 87 |
| <b>C77G12</b> | COVID-19 convalescent | S2-fusion peptide | 812, 814, 815, 817, 818, 820-824  | Inhibits the membrane fusion | BetaCoV              | PV: SARS-CoV ~40 µg/ml<br>PV: SARS-CoV-2 ~7 µg/ml<br>PV: MERS-CoV ~100 µg/ml                                                                                           | 87 |
| <b>76E1</b>   | COVID-19 convalescent | S2-fusion peptide | 815, 816, 819, 820, 822, 823, 825 | Inhibits the membrane fusion | AlphaCoV and BetaCoV | PV: SARS-CoV 4.821µg/ml<br>LV: SARS-CoV-2 0.343 µg/ml<br>PV: MERS-CoV 3.825 µg/ml<br>LV: HCoV-OC43 4.655µg/ml<br>LV: HCoV-229E 1.595µg/ml<br>LV: HCoV-NL63 3.943 µg/ml | 88 |

PV: pseudovirus; LV: live virus. SARS-CoV-2 WT: the SARS-CoV-2 Wuhan strain or in some cases the D614G variant. If the neutralizing potency was tested against both PV and LV, only IC<sub>50</sub> for neutralizing LV was listed in the table.
